# Supplementary material for: Evaluating the electronic structure and stability of epitaxially grown Sr-doped LaFeO3 perovskite alkaline O2 evolution model electrocatalysts
Source: Royal Society of Chemistry journal article supplement (doi:10.1039/d4lf00260a), 2024-10-04
Supplement: d4lf00260a1.pdf [file d4lf00260a1.pdf]

## Supporting Information

### **Evaluating the electronic structure and stability of epitaxially grown Sr-doped LaFeO<sub>3</sub> perovskite alkaline O<sub>2</sub> evolution model electrocatalysts**

Chuanmu Tian<sup>a</sup>, Clément Maheu<sup>a,b</sup>, Xiaochun Huang<sup>c</sup>, Freddy E. Oropeza<sup>d</sup>, Márton Major<sup>e</sup>, Joachim Brötz<sup>e</sup>, Marcus Einert<sup>a</sup>, Wolfgang Donner<sup>e</sup>, Kelvin Hongliang Zhang<sup>c</sup>, Jan P. Hofmann<sup>a\*</sup>

<sup>a</sup> Surface Science Laboratory, Department of Materials- and Geosciences, Technical University of Darmstadt, Peter-Grünberg-Straße 4, 64287 Darmstadt, Germany.

<sup>b</sup> Université de Nantes, CNRS, Institut des Matériaux Jean Rouxel, IMN, F-44000 Nantes, France.

<sup>c</sup> State Key Laboratory of Physical Chemistry of Solid Surfaces, College of Chemistry and Chemical Engineering, Xiamen University, Siming South Street 422, Xiamen 361005, P. R. China.

<sup>d</sup> Photoactivated Processes Unit, IMDEA Energy Institute, Parque Tecnológico de Móstoles, Avda. Ramón de la Sagra 3, 28935 Móstoles, Madrid, Spain.

<sup>e</sup> Department of Materials- and Geosciences, Technical University of Darmstadt, Peter-Grünberg-Straße 2, 64287 Darmstadt, Germany.

Corresponding author e-mail address: [hofmann@surface.tu-darmstadt.de](mailto:hofmann@surface.tu-darmstadt.de)

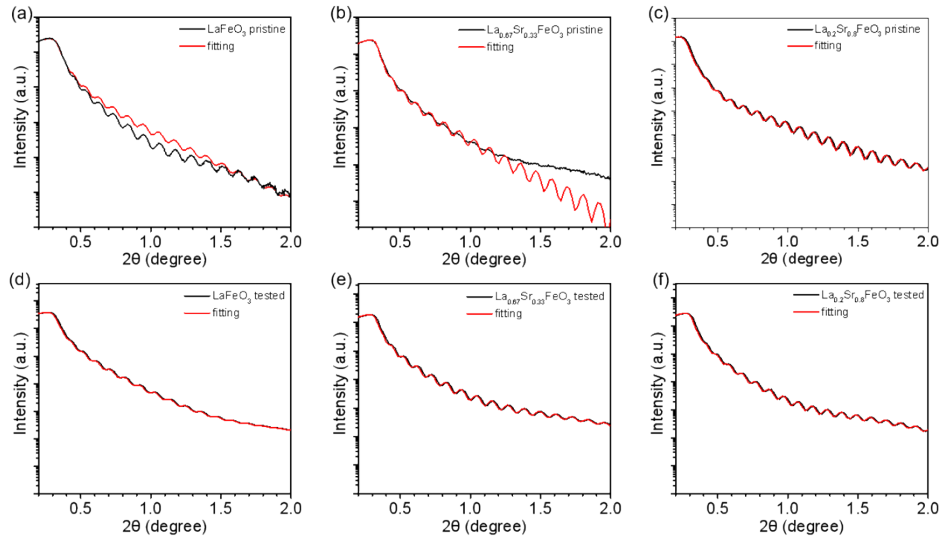

**Figure S1.** XRR experimental results (black curves) and the corresponding fitted results (red curves). (a) pristine LFO, (b) LSF-0.33 and (c) LSF-0.8. The XRR results of  $\text{La}_{1-x}\text{Sr}_x\text{FeO}_3$  ( $x = 0, 0.33, 0.8$ ) are fitted by the XRR fitting software ANALYSE from RayfleX. The thickness of the layer is correlated to the distance of the Kiessig fringes, which result from interference of the X-ray beams reflected on the film surface and on the interface to the substrate or the next film below. Even though the intensities between the measurement and the fitted curves do not fit very well, the thickness of the layer can still be calculated very precisely as long the maxima and minima of the oscillations (Kiessig fringes) in the measurement and the fit are at the same 2 Theta angles.

**Table S1.** XRR experimental fitting parameters of LFO, LSF-0.33, and LSF-0.8 before (pristine) and after 30 CV cycles.

|                  |       | LFO            |                | LSF-0.33       |                | LSF-0.8        |                |
|------------------|-------|----------------|----------------|----------------|----------------|----------------|----------------|
|                  |       | Pristine       | After 30 CV    | Pristine       | After 30 CV    | Pristine       | After 30 CV    |
| Crystalline      | Layer | $37.5 \pm 0.5$ | $36.9 \pm 0.3$ | $38.6 \pm 0.2$ | $35.6 \pm 0.4$ |                | $38.9 \pm 0.3$ |
| Thickness (nm)   |       |                |                |                |                |                |                |
| Amorphized       | Layer |                | $1.5 \pm 0.4$  |                | $2.0 \pm 0.3$  | $39.2 \pm 0.2$ | $1.9 \pm 0.4$  |
| Thickness (nm)   |       |                |                |                |                |                |                |
| XRR layer models |       | One layer      | Two layers     | One layer      | Two layers     | One layer      | Two layers     |
| Roughness        | XRR   | 0.61           | 0.69           | 0.67           | 0.82           | 1.73           | 0.41           |
| (nm)             |       |                |                |                |                |                |                |
| Roughness        | AFM   | 0.5            | 0.51           | 0.30           | 1.12           | 5.36           | 0.54           |
| (nm)             |       |                |                |                |                |                |                |

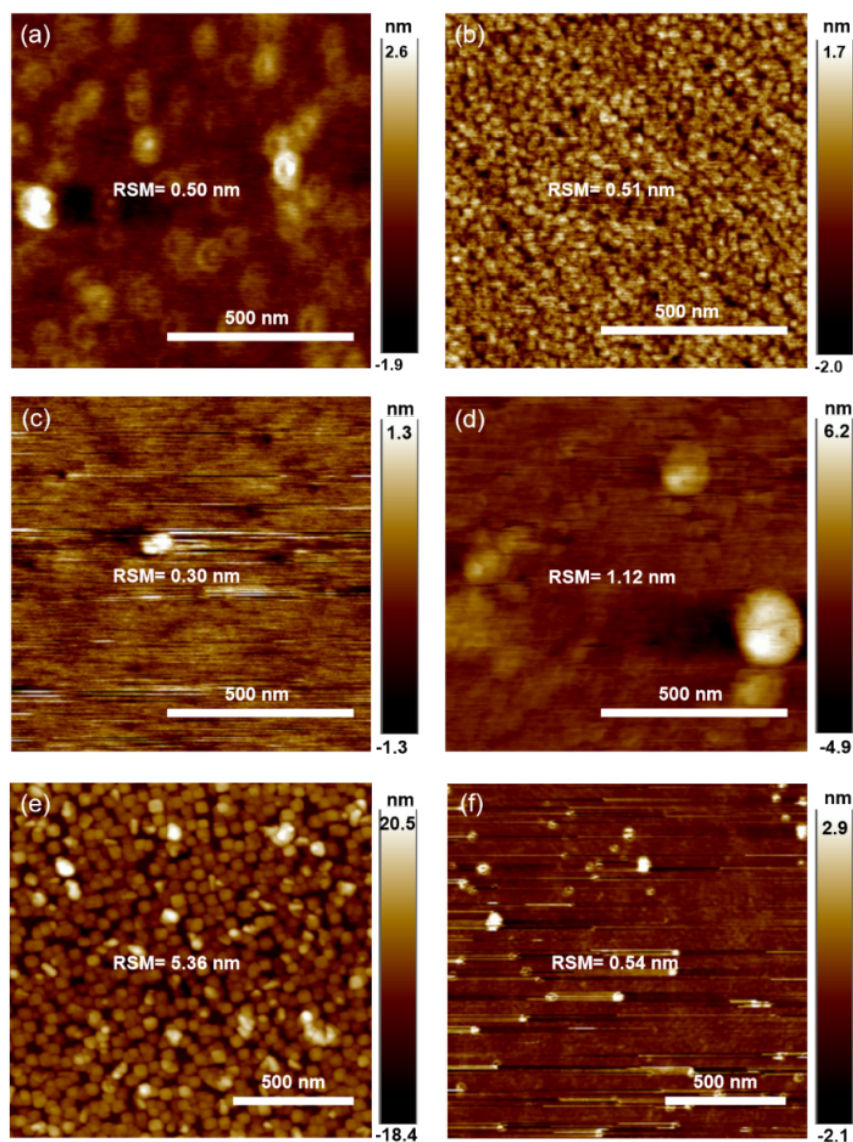

**Figure S2.** AFM images of  $\text{La}_{1-x}\text{Sr}_x\text{FeO}_3$  thin films in pristine state and after 30 CV cycles. (a) Pristine  $\text{LaFeO}_3$ , (b)  $\text{LaFeO}_3$  after 30 CV, (c) pristine  $\text{La}_{0.33}\text{Sr}_{0.67}\text{FeO}_3$ , (d)  $\text{La}_{0.33}\text{Sr}_{0.67}\text{FeO}_3$  after 30 CV, (e) pristine  $\text{La}_{0.2}\text{Sr}_{0.8}\text{FeO}_3$  and (f)  $\text{La}_{0.2}\text{Sr}_{0.8}\text{FeO}_3$  after 30 CV.

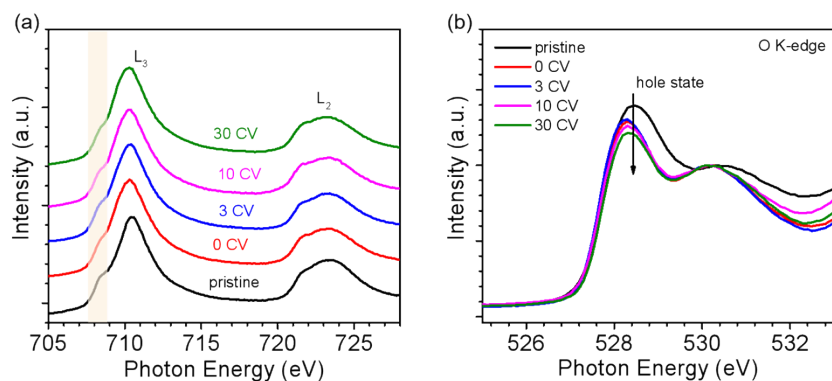

**Figure S3.** NEXAFS spectra of  $\text{La}_{0.2}\text{Sr}_{0.8}\text{FeO}_3$  with different CV cycles. (a) Fe  $L_{2,3}$ -edge and (b) O K-edge. The yellow bars in Figure S3a indicate the changes in the characteristics energy range of  $\text{Fe}^{3+}$  and  $\text{Fe}^{4+}$  at 708 eV under different CV cycles.

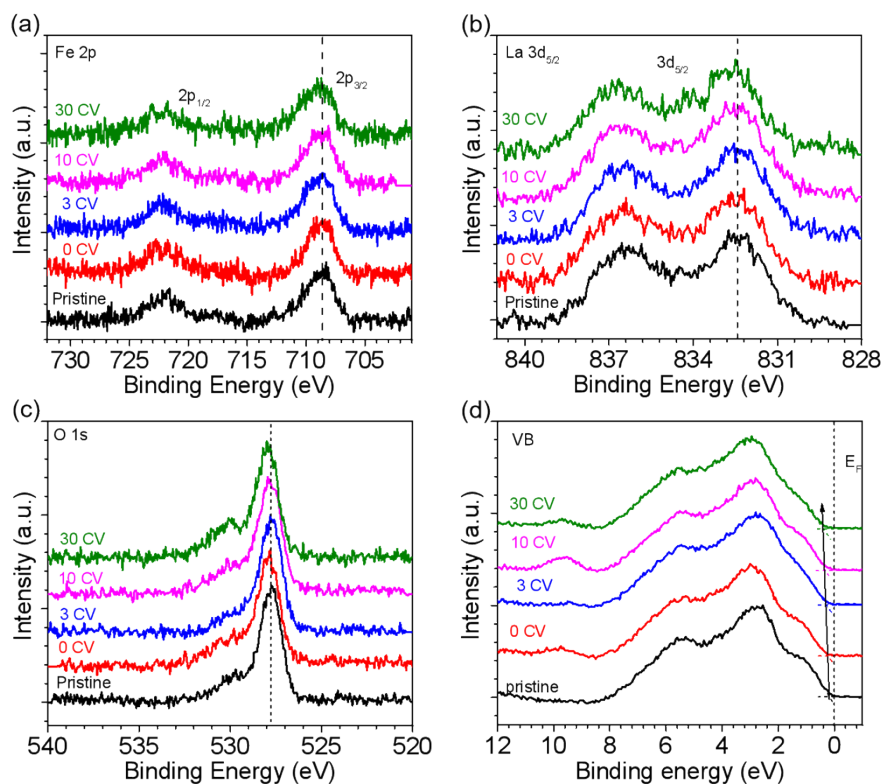

**Figure S4.** SXPS of  $\text{La}_{0.67}\text{Sr}_{0.33}\text{FeO}_3$  with kinetic energy constant at 550 eV. (a) Fe 2p, (b) La 3d, (c) O 1s and (d) VB spectra with different CV cycles.

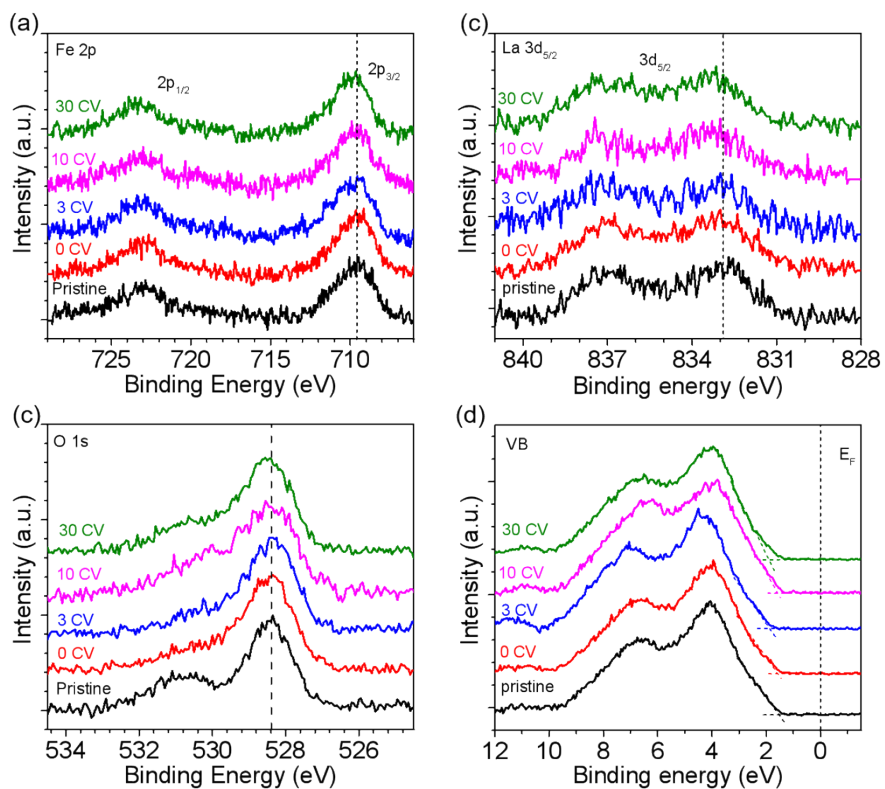

**Figure S5.** SXPS of  $\text{La}_{0.2}\text{Sr}_{0.8}\text{FeO}_3$  with kinetic energy constant at 550 eV. (a) Fe 2p, (b) La 3d, (c) O 1s and (d) VB spectra with different CV cycles.
